# Supplementary material for: Latest Insights on Adenovirus Structure and Assembly
Source: MDPI journal article supplement (doi:10.3390/v4050847), 2012-05-21
Supplement: s1 [file s1]

*Correction*

**San Martín, C., Correction: Latest Insights on Adenovirus Structure and Assembly. *Viruses* 2012, 4, 847-877.**

**Carmen San Martín**

Department of Macromolecular Structures, Centro Nacional de Biotecnología (CNB-CSIC), Darwin 3, 28049 Madrid, Spain; E-Mail: carmen@cnb.csic.es; Tel.: +34-915855450; Fax: +34-915854506

*Received: 19 December 2012 / Accepted: 19 December 2012 / Published: 19 December 2012*

---

It has come to my attention that my article "Latest Insights on Adenovirus Structure and Assembly" (*Viruses* **2012**, 4, 847-877) [1] contains an inaccurate statement.

On page 864, the caption for Figure 7 reads: "There are four potential cleavage sites in pTP but they have not been experimentally verified". However, three of these sites have been experimentally confirmed *in vitro* using recombinant AVP and pTP, as described in Webster A, Leith I.R., Hay R.T.: Activation of adenovirus-coded protease and processing of preterminal protein. *J. Virol.* **1994**, 68, 7292-7300 [2].

**References**

1. San Martín, C. Latest Insights on Adenovirus Structure and Assembly. *Viruses* **2012**, 4, 847-877.
2. Webster, A.; Leith, I.R.; Hay, R.T. Activation of adenovirus-coded protease and processing of preterminal protein. *J. Virol.* **1994**, 68, 7292-7300.

© 2012 by the authors; licensee MDPI, Basel, Switzerland. This article is an open access article distributed under the terms and conditions of the Creative Commons Attribution license (<http://creativecommons.org/licenses/by/3.0/>).
